# Supplementary material
Source: bioRxiv or medRxiv preprint supplement (https://www.biorxiv.org/highwire/filestream/123393/field_highwire_adjunct_files/1/408492-2.pdf)
Supplement: Supplementary file [file 408492-2.pdf]

Supplementary Table 2. Categories used to describe disease type of each proband

| <b>Category</b>                              | <b>Description</b>                                                |
|----------------------------------------------|-------------------------------------------------------------------|
| Allergies and disorders of the immune system | NA                                                                |
| Cardiology and vascular conditions           | heart, artery, vein, and lymph disorders                          |
| Dentistry and craniofacial                   | bones of head and face                                            |
| Dermatology                                  | skin diseases and disorders                                       |
| Endocrinology                                | disorder of the endocrine glands and hormones                     |
| Gastroenterology                             | disorder of the stomach and intestines                            |
| Gynecology and reproductive medicine         | NA                                                                |
| Hematology                                   | blood diseases and disorders                                      |
| Infectious diseases                          | NA                                                                |
| Musculoskeletal and orthopedics              | structural and functional disorders of muscles, bones, and joints |
| Nephrology                                   | kidney diseases and disorders                                     |
| Neurology                                    | disorders of the nervous system, including brain and spinal cord  |
| Oncology                                     | tumors and cancer                                                 |
| Ophthalmology                                | eye disorders and diseases                                        |
| Psychiatry                                   | NA                                                                |
| Pulmonology                                  | lung disorders and diseases                                       |
| Rheumatology                                 | immune disorders of the joints, muscles, and ligaments            |
| Urology                                      | NA                                                                |
| Toxicology and Environmental Medicine        | NA                                                                |
| N/A                                          | No information is available                                       |
| Multiple Congenital Anomalies                | NA                                                                |
| Other                                        | none of the above categories                                      |
